# Supplementary material for: A novel heterogeneous catalyst NH2-MIL-88/PMo10V2 for the photocatalytic activity enhancement of benzene hydroxylation
Source: Royal Society of Chemistry journal article supplement (doi:10.1039/d1cy01056e), 2021-01-01

Electronic Supplementary Material (ESI) for Catalysis Science & Technology.

### *Electronic Supporting Information*

#### **A Novel Heterogeneous Catalyst NH<sub>2</sub>-MIL-88/PMo<sub>10</sub>V<sub>2</sub> for Photocatalytic Activity Enhancement of Benzene Hydroxylation**

PanPan Xu<sup>1</sup>, Liuxue Zhang<sup>\*1</sup>, Xu Jia<sup>\*1</sup>, Hao Wen<sup>1</sup>, Xiulian Wang<sup>2</sup>, Suqing Yang<sup>1</sup>, Juxian Hui<sup>1</sup>

<sup>1</sup> School of Materials and Chemical Engineering, Zhongyuan University of Technology, Zhengzhou, 450007, PR China

<sup>2</sup> School of Energy and Environment, Zhongyuan University of Technology, Zhengzhou, 450007, PR China

Correspondence: [zlx100100@163.com](mailto:zlx100100@163.com), [jjax@zut.edu.cn](mailto:jjax@zut.edu.cn); Tel.: +86 -731-62506699; Fax: +86-731-62506095

- S1 The infrared partial spectra of (a) NH<sub>2</sub>-MIL-88, (b) H<sub>5</sub>PMo<sub>10</sub>V<sub>2</sub>O<sub>40</sub> and (c) NH<sub>2</sub>-MIL-88/PMo<sub>10</sub>V<sub>2</sub>-3
- S2 SEM images of the (a) NH<sub>2</sub>-MIL-88, (b) PMo<sub>10</sub>V<sub>2</sub> and (c) NH<sub>2</sub>-MIL-88/PMo<sub>10</sub>V<sub>2</sub>-3, EDS mapping of (d) NH<sub>2</sub>-MIL-88, (e) PMo<sub>10</sub>V<sub>2</sub> and (f) NH<sub>2</sub>-MIL-88/PMo<sub>10</sub>V<sub>2</sub>-3
- S3 XPS spectra of the catalyst (a) V2p and (b) Fe2p
- S4 EPR spectra of fresh NH<sub>2</sub>-MIL-88/PMo<sub>10</sub>V<sub>2</sub>-3 and recycled NH<sub>2</sub>-MIL-88/PMo<sub>10</sub>V<sub>2</sub>-3
- S5 UV-vis spectra of the fresh NH<sub>2</sub>-MIL-88/PMo<sub>10</sub>V<sub>2</sub>-3 catalyst and NH<sub>4</sub>VO<sub>3</sub>
- S6 UV-vis spectra of the recovered NH<sub>2</sub>-MIL-88/PMo<sub>10</sub>V<sub>2</sub>-3 catalyst and VO(acac)<sub>2</sub>
- S7 UV-Vis diffuse reflectance of the (a) NH<sub>2</sub>-MIL-88, (b) PMo<sub>10</sub>V<sub>2</sub> and (c) NH<sub>2</sub>-MIL-88/PMo<sub>10</sub>V<sub>2</sub>-3
- S8 The infrared fractionated gain spectra of (a) recycled NH<sub>2</sub>-MIL-88/PMo<sub>10</sub>V<sub>2</sub>-3 and (b) fresh NH<sub>2</sub>-MIL-88/PMo<sub>10</sub>V<sub>2</sub>-3
-

S9 The apparent quantum yield (AQY)

S10: Photo of the Photocatalytic instrument (PCX-50C)

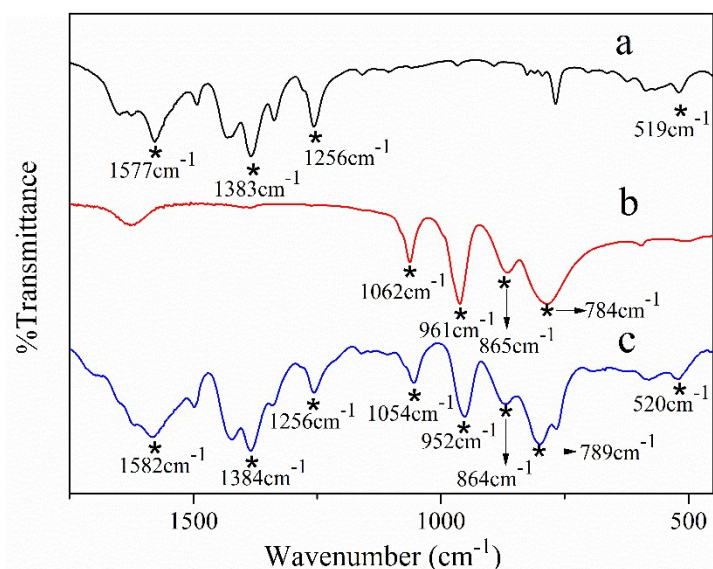

Fig S1. The infrared partial spectra of (a) NH<sub>2</sub>-MIL-88, (b) H<sub>5</sub>PMo<sub>10</sub>V<sub>2</sub>O<sub>40</sub> and (c) NH<sub>2</sub>-MIL-88/PMo<sub>10</sub>V<sub>2</sub>-3

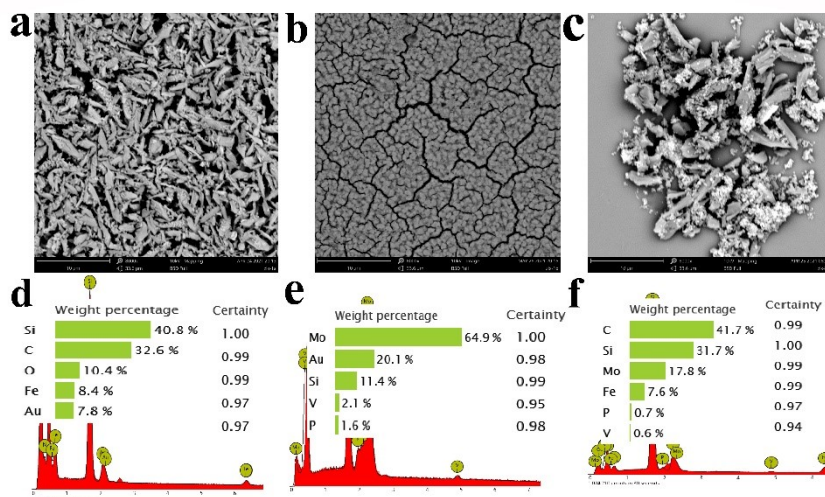

Figure S2 SEM images of the (a) NH<sub>2</sub>-MIL-88, (b) PMo<sub>10</sub>V<sub>2</sub> and (c) NH<sub>2</sub>-MIL-88/PMo<sub>10</sub>V<sub>2</sub>-3, EDS mapping of (d) NH<sub>2</sub>-MIL-88, (e) PMo<sub>10</sub>V<sub>2</sub> and (f) NH<sub>2</sub>-MIL-88/PMo<sub>10</sub>V<sub>2</sub>-3

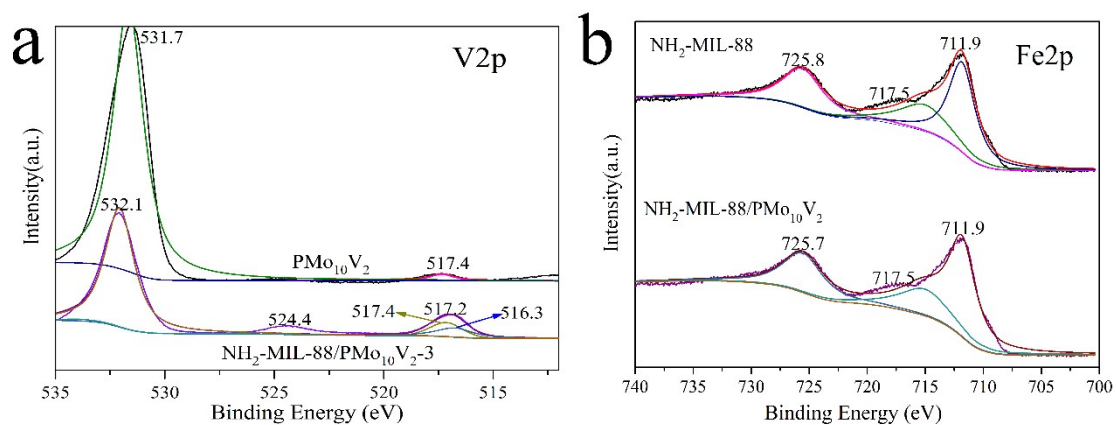

Figure S3 XPS spectra of the catalyst (a) V2p and (b) Fe2p

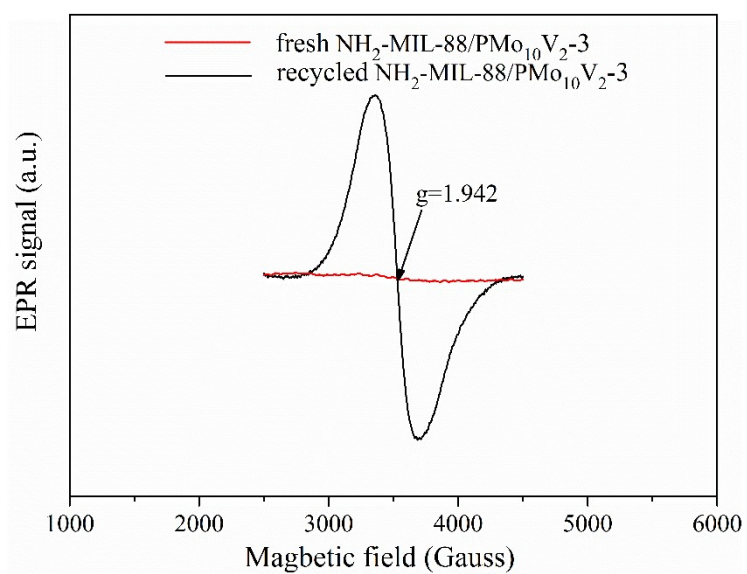

Figure S4 EPR spectra of fresh  $\text{NH}_2\text{-MIL-88/PMo}_{10}\text{V}_2\text{-3}$  and recycled  $\text{NH}_2\text{-MIL-88/PMo}_{10}\text{V}_2\text{-3}$

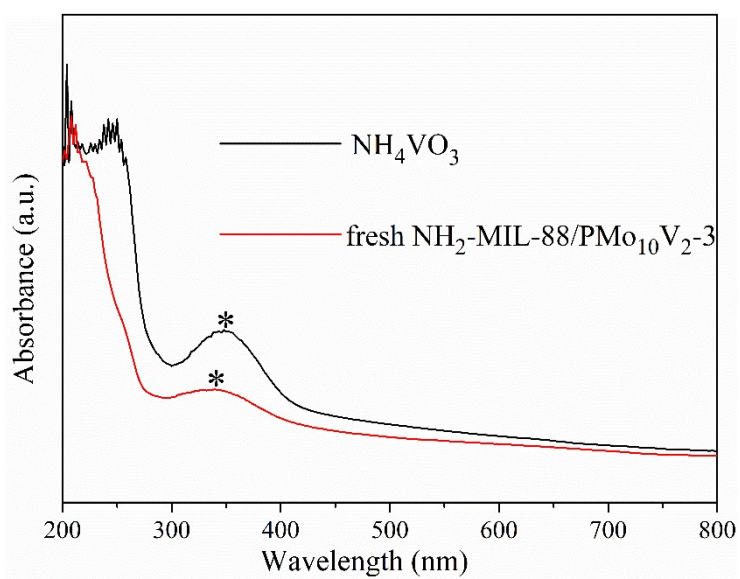

Fig S5 UV-vis spectra of the fresh  $\text{NH}_2\text{-MIL-88/PMo}_{10}\text{V}_2\text{-3}$  catalyst and  $\text{NH}_4\text{VO}_3$

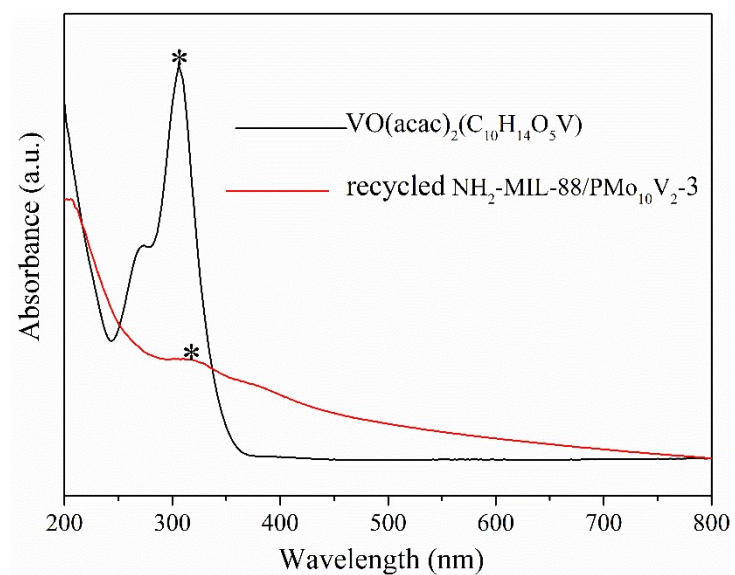

Fig S6 UV-vis spectra of the recovered  $\text{NH}_2\text{-MIL-88/PMo}_{10}\text{V}_2\text{-3}$  catalyst and  $\text{VO}(\text{acac})_2$

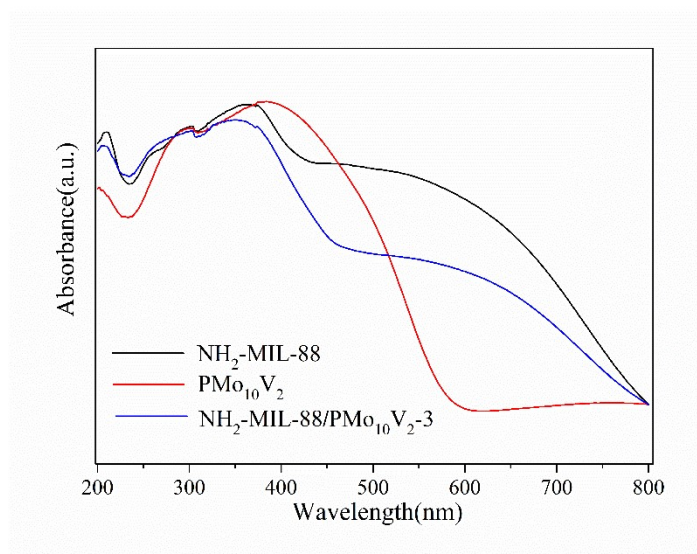

Figure S7 UV-Vis diffuse reflectance of the (a) NH<sub>2</sub>-MIL-88, (b) PMo<sub>10</sub>V<sub>2</sub> and (c) NH<sub>2</sub>-MIL-88/PMo<sub>10</sub>V<sub>2</sub>-3

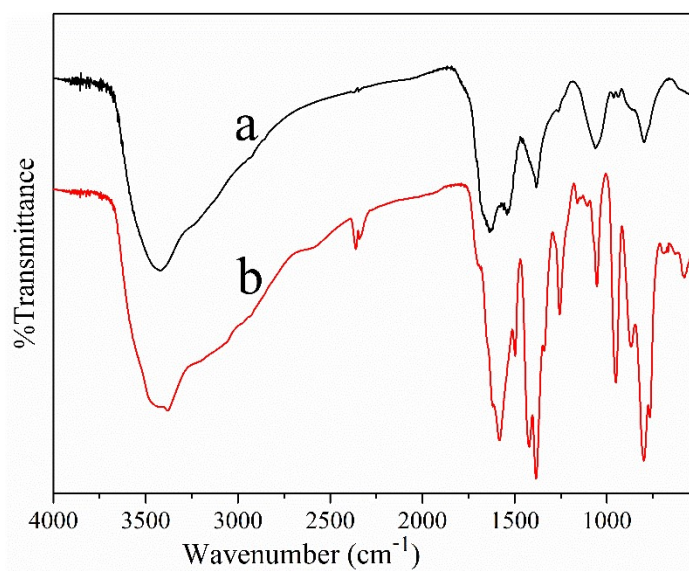

Fig S8. The infrared fractionated gain spectra of (a) recycled NH<sub>2</sub>-MIL-88/PMo<sub>10</sub>V<sub>2</sub>-3 and (b) fresh NH<sub>2</sub>-MIL-88/PMo<sub>10</sub>V<sub>2</sub>-3

Fig S9

Since the light source (white light and wavelength range from 320 nm to 780 nm) used in this experiment is fixed inside the PCX-50C instrument, the AQY can't be measured at a single wavelength. Hence, under optimal conditions, the Apparent Quantum Yield (AQY) of the photocatalytic hydroxylation of benzene to phenol at the minimum wavelength ( $\lambda=320$  nm) and the maximum wavelength ( $\lambda=780$  nm) was determined to be 3.55% and 1.45%, respectively according to the following equation, where  $R_1$  ( $\text{mol s}^{-1}$ ) is the hydroxylation of benzene to phenol rate in 3 h and  $R_2$  ( $\text{mol s}^{-1}$ ) is the rate of incident photon.

$$\text{AQY (\%)} = (R_1 / R_2) \times 100\%$$

As one electron produce one hydroxyl radical, hence one photon is required for this system. Assuming that all photons are absorbed by the catalyst, the resulting quantum yield can be calculated as the apparent quantum yield.

Fig S10

Photo of the Photocatalytic instrument (PCX-50C):

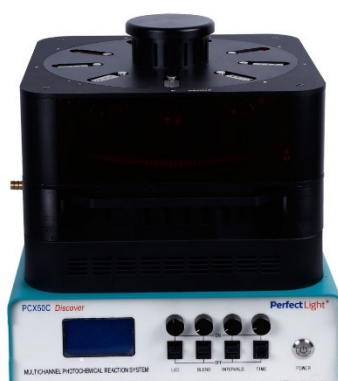

Supplement: d1cy01056e1.pdf [file d1cy01056e1.pdf]
